# Supplementary material for: Predictive validity of the National Benchmark Test and National Senior Certificate for the academic success of first-year medical students at one South African university
Source: BMC Med Educ. 2020 May 13;20:152. doi: 10.1186/s12909-020-02059-8 (PMC7218523; doi:10.1186/s12909-020-02059-8)
Supplement: Supplementary file 1 — Additional file 1. [file 12909_2020_2059_MOESM1_ESM.docx]

| **Correlations** | | | | | | | | | |
| --- | --- | --- | --- | --- | --- | --- | --- | --- | --- |
|  | | NBT Mathematics | NBT Academic Literacy | NBT Quan-titative Literacy | English | Maths | Life Science | Physical Science | First-year results |
| NBT Mathematics | Pearson Correlation | 1 | .341** | .542** | .268** | .643** | .337** | .441** | .458** |
| Sig. (2-tailed) |  | .000 | .000 | .000 | .000 | .000 | .000 | .000 |
| N | 1236 | 1236 | 1236 | 1236 | 1236 | 1236 | 1236 | 1236 |
| NBT Academic  Literacy | Pearson Correlation | .341** | 1 | .562** | .426** | .150** | .109** | .002 | .356** |
| Sig. (2-tailed) | .000 |  | .000 | .000 | .000 | .000 | .941 | .000 |
| N | 1236 | 1236 | 1236 | 1236 | 1236 | 1236 | 1236 | 1236 |
| NBT Quantitative Literacy | Pearson Correlation | .542** | .562** | 1 | .273** | .368** | .135** | .194** | .401** |
| Sig. (2-tailed) | .000 | .000 |  | .000 | .000 | .000 | .000 | .000 |
| N | 1236 | 1236 | 1236 | 1236 | 1236 | 1236 | 1236 | 1236 |
| English | Pearson Correlation | .268** | .426** | .273** | 1 | .336** | .426** | .306** | .391** |
| Sig. (2-tailed) | .000 | .000 | .000 |  | .000 | .000 | .000 | .000 |
| N | 1236 | 1236 | 1236 | 1236 | 1236 | 1236 | 1236 | 1236 |
| Maths | Pearson Correlation | .643** | .150** | .368** | .336** | 1 | .491** | .694** | .559** |
| Sig. (2-tailed) | .000 | .000 | .000 | .000 |  | .000 | .000 | .000 |
| N | 1236 | 1236 | 1236 | 1236 | 1236 | 1236 | 1236 | 1236 |
| Life Sciences | Pearson Correlation | .337** | .109** | .135** | .426** | .491** | 1 | .619** | .452** |
| Sig. (2-tailed) | .000 | .000 | .000 | .000 | .000 |  | .000 | .000 |
| N | 1236 | 1236 | 1236 | 1236 | 1236 | 1236 | 1236 | 1236 |
| Physical Sciences | Pearson Correlation | .441** | .002 | .194** | .306** | .694** | .619** | 1 | .501** |
| Sig. (2-tailed) | .000 | .941 | .000 | .000 | .000 | .000 |  | .000 |
| N | 1236 | 1236 | 1236 | 1236 | 1236 | 1236 | 1236 | 1236 |
| YOS1 | Pearson Correlation | .458** | .356** | .401** | .391** | .559** | .452** | .501** | 1 |
| Sig. (2-tailed) | .000 | .000 | .000 | .000 | .000 | .000 | .000 |  |
| N | 1236 | 1236 | 1236 | 1236 | 1236 | 1236 | 1236 | 1236 |
| ** Correlation is significant at the 0.01 level (2-tailed) | | | | | | | | | |

| **Correlations** | | | | | | | | |
| --- | --- | --- | --- | --- | --- | --- | --- | --- |
|  | | First-year results | NBT AL | NBT QL | NBT MAT | Maths | Life Science | Physical Science |
| Pearson Correlation | First-year results | 1.000 | .356 | .401 | .458 | .559 | .452 | .501 |
| NBT AL | .356 | 1.000 | .562 | .341 | .150 | .109 | .002 |
| NBT QL | .401 | .562 | 1.000 | .542 | .368 | .135 | .194 |
| NBT MAT | .458 | .341 | .542 | 1.000 | .643 | .337 | .441 |
| Maths | .559 | .150 | .368 | .643 | 1.000 | .491 | .694 |
| Life Science | .452 | .109 | .135 | .337 | .491 | 1.000 | .619 |
| Physical Science | .501 | .002 | .194 | .441 | .694 | .619 | 1.000 |
| Sig. (1-tailed) | First year result | . | .000 | .000 | .000 | .000 | .000 | .000 |
| NBTAL | .000 | . | .000 | .000 | .000 | .000 | .470 |
| NBTQL | .000 | .000 | . | .000 | .000 | .000 | .000 |
| NBT MAT | .000 | .000 | .000 | . | .000 | .000 | .000 |
| Maths | .000 | .000 | .000 | .000 | . | .000 | .000 |
| Life Science | .000 | .000 | .000 | .000 | .000 | . | .000 |
| Physical Science | .000 | .470 | .000 | .000 | .000 | .000 | . |
| N | First-year results | 1236 | 1236 | 1236 | 1236 | 1236 | 1236 | 1236 |
| NBTAL | 1236 | 1236 | 1236 | 1236 | 1236 | 1236 | 1236 |
| NBTQL | 1236 | 1236 | 1236 | 1236 | 1236 | 1236 | 1236 |
| NBT MAT | 1236 | 1236 | 1236 | 1236 | 1236 | 1236 | 1236 |
| Maths | 1236 | 1236 | 1236 | 1236 | 1236 | 1236 | 1236 |
| Life Science | 1236 | 1236 | 1236 | 1236 | 1236 | 1236 | 1236 |
| Physical Science | 1236 | 1236 | 1236 | 1236 | 1236 | 1236 | 1236 |
